# Supplementary material
Source: PubMed Central journal article supplement (PMC4682318)
Supplement: supp_tpc.15.00395_TPC2015-00395-RAR1_Supplemental_Data_pdf.pdf [file supp_tpc.15.00395_TPC2015-00395-RAR1_Supplemental_Data_pdf.pdf]

A

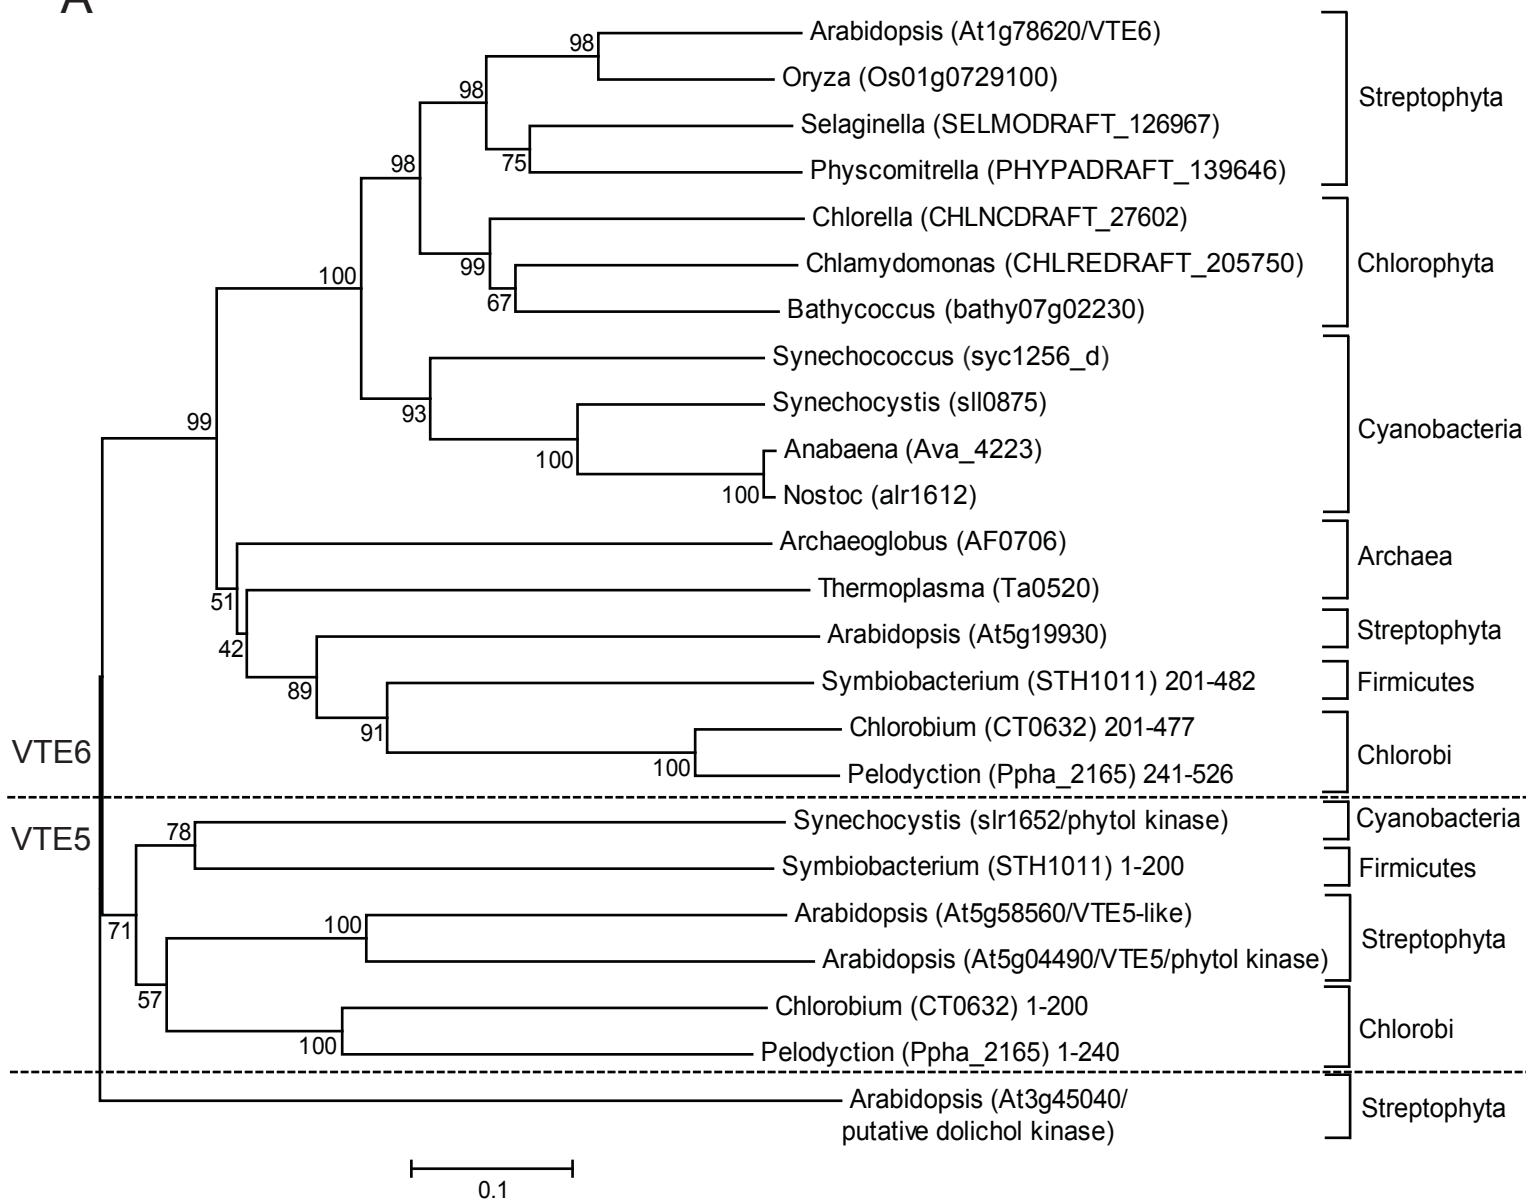

B

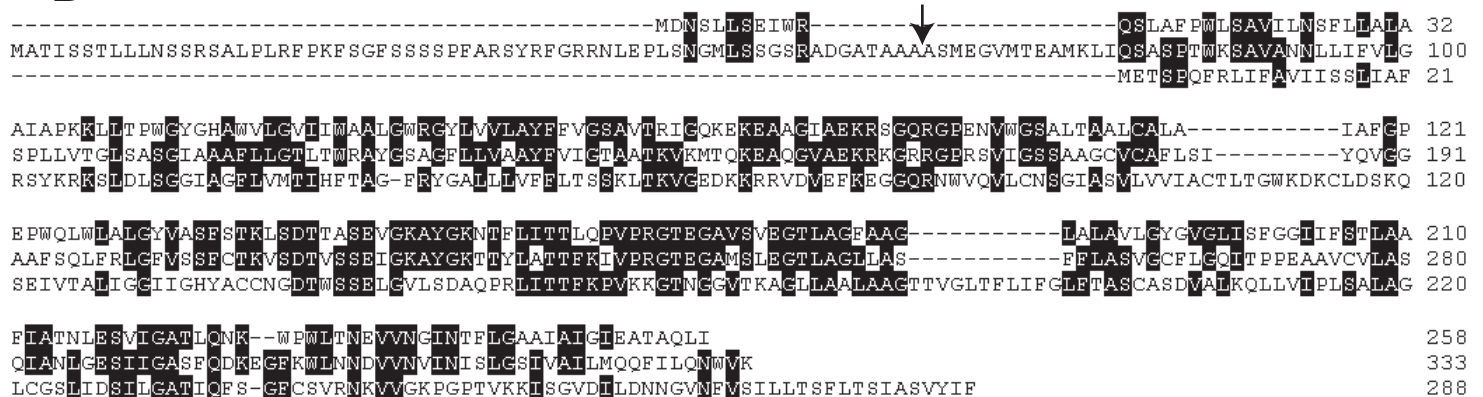

### Supplemental Figure 1. Phylogenetic Relationship of COG1836-Like Sequences.

(A) Phylogenetic analysis of phytol kinase (VTE5) and phytyl-P kinase (VTE6) sequences from plants and bacteria using MEGA6 (Tamura et al., 2013). Protein sequences from *Arabidopsis*, *Oryza sativa*, *Physcomitrella patens*, *Selaginella moellendorffii*, *Chlorella*, *Chlamydomonas reinhardtii*, *Bathycoccus*, *Synechococcus*, *Synechocystis*, *Anabaena*, *Nostoc*, *Archeoglobus*, *Thermoplasma*, *Symbiobacterium*, *Chlorobium* and *Pelodyction* were obtained from GenBank. The phylogenetic analysis was done using the neighbor-joining-method. In the x-dimension, branch length represents evolutionary distance (number of amino acid differences per site). Bootstrap values were calculated from 1000 replicates.

(B) Alignment of COG1836-like sequences from *Arabidopsis* and *Synechocystis*.

The *Arabidopsis* VTE6 sequence (At1g78620, middle) was aligned with the COG1836 sequence from *Synechocystis* (sll0875, top) and At5g19930 (bottom) using ClustalW (MEGA6). The arrow indicates the predicted transit peptide cleavage site (position 65/66; ChloroP1.1).

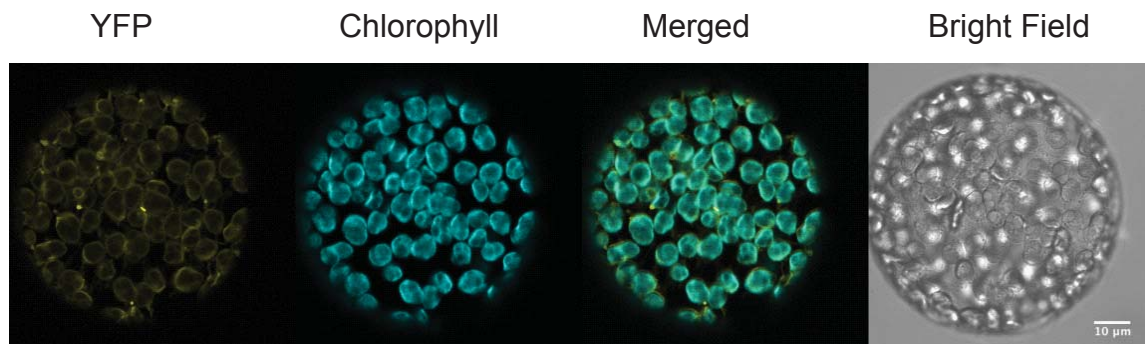

**Supplemental Figure 2.** Subcellular localization of VTE6.

The fusion protein of YFP:VTE6 (VTE6 C-terminally fused to yellow fluorescent protein) was transiently expressed in *N. benthamiana* leaves and fluorescence in isolated protoplasts observed by confocal microscopy.

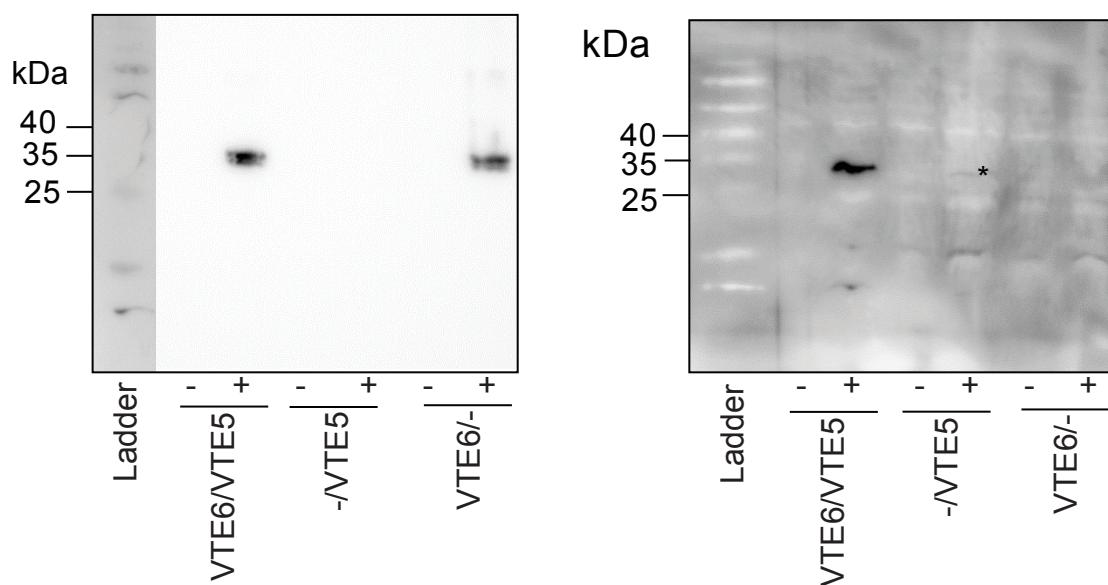

**Supplemental Figure 3.** Heterologous expression of VTE5 and VTE6 in *E. coli*.

After ligation into pETDuet-1, His:VTE6 and/or VTE5:S fusion proteins were expressed in *E. coli* Rosetta for 4 h. Total protein extracts were isolated from cells before (-) and after (+) induction with IPTG, and expression of fusion proteins was demonstrated by immunodetection using antibodies against His- and S-tag, respectively. The asterisk indicates the weak signal of VTE5:S. Molecular masses of His:VTE6 and VTE5:S are 35 kDa.

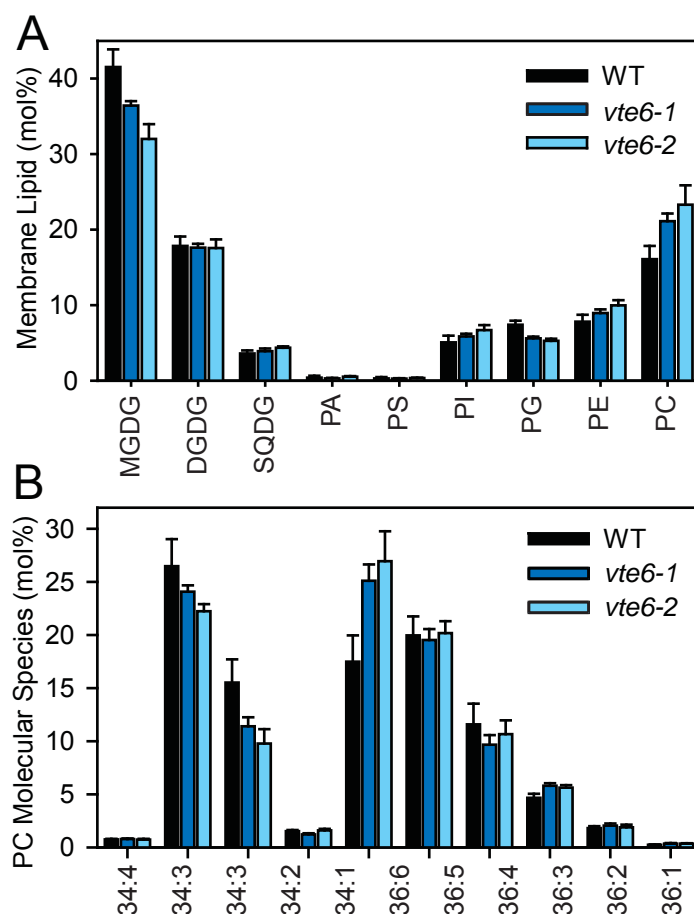

**Supplemental Figure 4.** Membrane Glycerolipids in Leaves of the *vte6* Mutant.

(A) Glycerolipids are presented in mol%.

(B) Molecular species composition of phosphatidylcholine (PC) in mol%.

Lipids were measured in leaves extracts of WT, *vte6-1* and *vte6-2* by direct infusion mass spectrometry (Gasulla et al., 2013). Data are mean and SD of 4 measurements. \*Significantly different to WT;  $p < 0.05$ ; Student's t test. Molecular species are indicated as X:Y, where X represents the number of the carbon atoms, and Y the number of double bonds, in the two acyl chains. DGDG, digalactosyldiacylglycerol; MGDG, monogalactosyldiacylglycerol; PA, phosphatidic acid; PC, phosphatidylcholine; PE, phosphatidylethanolamine; PG, phosphatidylglycerol; PI, phosphatidylinositol; PS, phosphatidylserine; SQDG, sulfoquinovosyldiacylglycerol.

| <b>Supplemental Table 1: Oligonucleotides Used in this Study</b> |                                                         |                                                |
|------------------------------------------------------------------|---------------------------------------------------------|------------------------------------------------|
| Primer                                                           | Sequence                                                | Gene target                                    |
| bn130                                                            | TCCGTTCCGTTTTTCGTTTTTAC                                 | Transposon primer Ds5-2a G-edge                |
| bn232                                                            | CCGGATCGTATCGGTTTTCG                                    | Transposon primer Ds3-2a H-edge                |
| bn233                                                            | ATGGCAACGATTTTCGTCAACTC                                 | VTE6 forward ( <i>vte6-1</i> , <i>vte6-2</i> ) |
| bn234                                                            | GTCCAGCCAATGTTTCCTTCAAG                                 | VTE6 reverse ( <i>vte6-1</i> , <i>vte6-2</i> ) |
| bn771                                                            | ACTGTACCTCCGTCAATCGCC                                   | VTE5 forward ( <i>vte5-2</i> )                 |
| bn772                                                            | AAGCTTAAGACAAGCGCGTATG                                  | VTE5 reverse( <i>vte5-2</i> )                  |
| bn78                                                             | ATTTTGCCGATTTTCGGAAC                                    | Left border primer SALK                        |
| bn358                                                            | GCCATCCAAGCTGTTCTCTC                                    | Forward RT-PCR primer <i>ACT2</i>              |
| bn359                                                            | GAACCACCGATCCAGACACT                                    | Reverse RT-PCR primer <i>ACT2</i>              |
| bn577                                                            | GCAACGAAGGTTAAAATGACGC                                  | Forward RT-PCR primer <i>VTE6</i>              |
| bn578                                                            | GAAGCACCTATTATGCTCTCTC                                  | Reverse RT-PCR primer <i>VTE6</i>              |
| bn410                                                            | CAAACCTCAGTTCCTCCGTC                                    | Forward RT-PCR primer <i>VTE5</i>              |
| bn411                                                            | GTCCGTTAATAACAAGCCTTAAG                                 | Reverse RT-PCR primer <i>VTE5</i>              |
| bn327                                                            | CCTAGGATGGCAACGATTTTCGTCAACT<br>C                       | Forward VTE6 overexpression                    |
| bn328                                                            | GTCGACTTACTTGACCCAGTTCTGGAG                             | Reverse VTE6 overexpression                    |
| CB157                                                            | AAAAGCAGGCTTCGAAGGAGATAGAA<br>CCATGGCAACGATTTTCGTCAACTC | YFP::VTE6 expression, forward                  |
| CB158                                                            | AGAAAGCTGGGTGCTTGACCCAGTTCT<br>GGAGTATA                 | YFP::VTE6 expression, reverse                  |
| CB1                                                              | AAGGATCCGATGGCAACGATTTTCGTC<br>ACTC                     | VTE6 expression in <i>E. coli</i> , forward    |
| CB2                                                              | AAGCGGCCGCTTACTTGACCCAGTTCT<br>GGAGT                    | VTE6 expression in <i>E. coli</i> , reverse    |
| CB3                                                              | AACATATGATGGCAGCAACCTTACCTC<br>TAT                      | VTE5 expression in <i>E. coli</i> , forward    |
| CB4                                                              | AAGGCCGGCCCGATATCCGAAACTTAA<br>ATAAGCAGCTA              | VTE5 expression in <i>E. coli</i> , reverse    |
